# Supplementary material
Source: HighWire-hosted journal article supplement (https://ard.bmj.com/content/78/6/817)
Supplement: inline-supplementary-material-2 [file inline-supplementary-material-2.xlsx]

## Sheet: Involved area (forearm)
dSSc	lSSc	Overlap
A2M	A2M	A2M
AARS	ACTA2	ACTA2
ABI3	ADCY3	ADCY3
ACER3	ALG1L	ALPK2
ACKR1	ALPK2	ANGPT2
ACKR2	ANGPT2	ARHGAP4
ACP5	ARHGAP4	ARHGDIB
ACTA1	ARHGDIB	ARPC1B
ACTA2	ARPC1B	ASPN
ACTB	ASPN	BASP1
ACTG2	BASP1	BATF3
ACTN1	BATF3	BGN
ACVR1	BGN	BHLHE22
ACVRL1	BHLHE22	BST2
ADAM12	BST2	C12orf75
ADAM19	C12orf75	C1QA
ADAM8	C1QA	C1QB
ADAMDEC1	C1QB	C1QTNF5
ADAMTS1	C1QTNF5	C1QTNF6
ADAMTS4	C1QTNF6	C1S
ADAMTS9	C1S	C2
ADAMTSL2	C2	CALD1
ADCY3	CALD1	CALU
ADCY4	CALU	CCDC92
ADCYAP1	CCDC92	CCL19
ADGRL4	CCL19	CCL2
ADRA2A	CCL2	CCL8
AEBP1	CCL8	CD63
AFAP1L2	CD63	CD93
AIF1	CD93	CDH11
AIFM2	CDH11	CFB
AKR1B1	CFB	CHN1
AKR1B10	CHN1	CLEC14A
ALDH16A1	CLEC14A	CLIC6
ALDH18A1	CLIC6	CMKLR1
ALDH1A3	CMKLR1	CNN3
ALDH1B1	CNN3	COL15A1
ALOX5	COL15A1	COL1A1
ALOX5AP	COL1A1	COL3A1
ALPK2	COL3A1	COL4A1
ALPL	COL4A1	COL4A2
ANAPC11	COL4A2	COL5A1
ANGPT2	COL5A1	COL5A2
ANGPTL2	COL5A2	COL6A3
ANGPTL4	COL6A3	COL8A1
ANXA5	COL8A1	COLEC12
ANXA6	COLEC12	COMP
AOAH	COMP	COPRS
AOC3	COPRS	COTL1
APBB1IP	COTL1	CPXM1
APH1B	CPXM1	CPXM2
APLN	CPXM2	CTGF
APLNR	CTGF	CTHRC1
APOL2	CTHRC1	CTSC
APOL3	CTSC	CYR61
AQP1	CYR61	DAB2
ARAP3	DAB2	DIO2
ARF4	DIO2	DRAM1
ARHGAP22	DRAM1	DYSF
ARHGAP4	DYSF	ECSCR
ARHGAP9	ECSCR	EFEMP1
ARHGDIB	EFEMP1	ELN
ARHGEF17	ELN	ENG
ARHGEF2	ENG	EPSTI1
ARID5A	EPSTI1	F2RL2
ARPC1B	F2RL2	FAM198B
ARRB2	FAM198B	FAP
ASPN	FAP	FCGR2A
ASTN2	FCGR2A	FERMT2
ATF5	FERMT2	FHL2
ATP13A1	FHL2	FMO3
ATP6V0E1	FMO3	FMOD
B4GALT1	FMOD	FNDC1
B4GALT5	FNDC1	FSTL1
B9D2	FSTL1	FTL
BACE2	FTL	FZD4
BAG2	FZD4	GMFG
BASP1	GMFG	GPX1
BATF	GPX1	GUCY1A3
BATF3	GUCY1A3	HEG1
BAX	HEG1	HMCN1
BCAR1	HMCN1	IFI27
BCL3	IFI27	IFI44
BCL6B	IFI44	IFI6
BGN	IFI6	IFIT3
BHLHE22	IFIT3	IFITM1
BHMT2	IFITM1	IFITM2
BID	IFITM2	IFITM3
BNC2	IFITM3	IGFBP2
BST2	IGFBP2	IGFBP4
C10orf10	IGFBP4	IGFBP7
C10orf11	IGFBP7	ISG15
C11orf24	ISG15	LAMA2
C12orf75	LAMA2	LAMB1
C17orf62	LAMB1	LAMC1
C19orf66	LAMC1	LHFPL2
C1orf122	LHFPL2	LILRB3
C1orf123	LILRB3	LIPA
C1orf162	LIPA	LMCD1
C1orf54	LMCD1	LOXL1
C1QA	LOXL1	LRRC15
C1QB	LRRC15	LRRC32
C1QC	LRRC32	LRRN1
C1QTNF3	LRRN1	LTBP2
C1QTNF5	LTBP2	LUM
C1QTNF6	LUM	MDK
C1R	MDK	MME
C1S	MME	MMP11
C2	MMP11	MNDA
C20orf27	MNDA	MPDZ
C3	MPDZ	MS4A7
C6	MS4A7	MX1
C7	MX1	MX2
C7orf50	MX2	MXRA5
C8orf4	MXRA5	MYL6
CALD1	MYL6	NEK6
CALR	NEK6	NEXN
CALU	NEXN	NID2
CAP2	NID2	NNMT
CAPN2	NNMT	NOV
CAPN5	NOV	NOX4
CAPNS1	NOX4	NREP
CARD6	NREP	OAF
CARHSP1	OAF	P3H1
CCDC167	P3H1	P4HA3
CCDC28B	P4HA3	PALLD
CCDC92	PALLD	PARVA
CCL13	PARVA	PCSK5
CCL18	PCSK5	PDE1A
CCL19	PDE1A	PENK
CCL2	PENK	PLCE1
CCL3	PLCE1	PLEK
CCL3L3	PLEK	PLEKHO2
CCL4	PLEKHO2	PLSCR3
CCL5	PLSCR3	PMEPA1
CCL8	PMEPA1	PPIC
CCM2	PPIC	PRDX4
CCM2L	PRDX4	PRSS23
CCR1	PRSS23	PTGDS
CCR5	PTGDS	PXDN
CCR7	PXDN	RAB31
CD14	RAB31	RASSF4
CD151	RASSF4	RCN1
CD163	RCN1	RGS5
CD163L1	RGS5	ROBO4
CD1C	ROBO4	RTP4
CD2	RTP4	SAA1
CD200	SAA1	SCHIP1
CD209	SCHIP1	SELP
CD247	SELP	SERPINE2
CD27	SERPINE2	SFRP4
CD300A	SFRP4	SLC15A3
CD300C	SLC15A3	SLC1A3
CD33	SLC1A3	SLCO2B1
CD37	SLCO2B1	SMOC2
CD48	SMOC2	SPARC
CD52	SPARC	SPON1
CD53	SPON1	SRD5A2
CD63	SRD5A2	SRPX
CD68	SRPX	STARD8
CD74	STARD8	STMN2
CD83	STMN2	SULF1
CD93	SULF1	SULF2
CDC25B	SULF2	SYNC
CDH11	SYNC	TAGLN
CDH13	TAGLN	TGFB3
CDH5	TGFB3	THBS1
CDK2AP2	THBS1	THY1
CDKN2A	THY1	TIMP1
CDO1	TIMP1	TM4SF18
CDR2L	TM4SF18	TMEM119
CEMIP	TMEM119	TMEM173
CFB	TMEM173	TMEM176A
CFI	TMEM176A	TMEM176B
CFL1	TMEM176B	TMEM204
CFP	TMEM204	TMSB10
CGREF1	TMSB10	TNC
CH25H	TNC	TNFSF13B
CHN1	TNFSF13B	TPM2
CHPF2	TPM2	TPM4
CHRDL2	TPM4	TRIB2
CHST15	TRIB2	TSHZ3
CHSY1	TSHZ3	TYMP
CHSY3	TYMP	VASH1
CIITA	VASH1	VCAM1
CLEC10A	VCAM1	VCAN
CLEC11A	VCAN	VSIG4
CLEC14A	VSIG4	VWCE
CLEC4G	VWCE	VWF
CLIC4	VWF	WARS
CLIC6	WARS	WFDC1
CLIP3	WFDC1
CMKLR1
CMTM3
CMTM7
CNN2
CNN3
COL10A1
COL11A1
COL12A1
COL14A1
COL15A1
COL16A1
COL18A1
COL1A1
COL1A2
COL3A1
COL4A1
COL4A2
COL4A4
COL5A1
COL5A2
COL6A1
COL6A3
COL6A6
COL8A1
COL8A2
COLEC12
COLGALT1
COMP
COPRS
COPS8
COPZ2
CORO1A
CORO1B
COTL1
COX4I2
CPXM1
CPXM2
CPZ
CRELD2
CRISPLD2
CSF1R
CSF2RA
CSPG4
CSRP2
CST3
CTGF
CTHRC1
CTPS1
CTSB
CTSC
CTSS
CTSZ
CX3CL1
CX3CR1
CXCL1
CXCL10
CXCL13
CXCL9
CXCR4
CYB561D2
CYBA
CYBB
CYFIP2
CYGB
CYP26A1
CYR61
CYTH4
CYTL1
CYTOR
CYYR1
DAB2
DACT1
DACT3
DAP
DCTPP1
DDX58
DENND5A
DEPTOR
DERL3
DFNA5
DHX58
DIO2
DKK3
DMPK
DNAJB5
DNASE1L3
DPT
DPYSL3
DPYSL4
DRAM1
DUSP23
DUSP6
DYSF
E2F3
ECSCR
EDNRA
EFEMP1
EFEMP2
EFHD2
EGFL7
EGFLAM
EGLN2
EHD2
EHD4
ELN
EMID1
EMILIN1
ENC1
ENG
ENPP1
ENPP2
ENTPD1
EPAS1
EPB41L2
EPDR1
EPSTI1
ESAM
ESYT1
ETHE1
EVA1B
F13A1
F2RL2
FAAP100
FAH
FAM110B
FAM162B
FAM171A1
FAM173A
FAM198B
FAM20A
FAM20C
FAM213B
FAM26F
FAM49A
FAM78A
FAP
FARP1
FAT1
FBN1
FBXL7
FCER1G
FCGR1B
FCGR2A
FCGR3A
FCGRT
FCN1
FDCSP
FERMT2
FERMT3
FES
FGD3
FGF18
FGR
FHL2
FHOD1
FILIP1L
FKBP11
FLI1
FLOT1
FLOT2
FLRT2
FMO1
FMO3
FMOD
FN1
FNDC1
FNDC4
FOLR2
FPR1
FPR3
FSCN1
FSTL1
FSTL3
FTH1
FTL
FTO
FUCA1
FUOM
FYB
FZD2
FZD4
GADD45B
GALNT14
GALNT18
GBP1
GBP4
GBP5
GCGR
GDF10
GDF15
GEM
GFRA3
GGT5
GGTA1P
GIMAP2
GIMAP4
GIMAP5
GIMAP6
GIMAP8
GJA4
GLIPR1
GLIPR2
GLMP
GLT8D2
GMFG
GMIP
GNAI2
GNG11
GP9
GPI
GPR183
GPR34
GPR4
GPR68
GPX1
GPX7
GPX8
GRB10
GRK5
GRN
GRP
GSDMD
GSTO1
GUCY1A3
GUCY1B3
GZMA
GZMB
GZMH
GZMK
H19
HAPLN1
HAPLN3
HAVCR2
HCFC1R1
HCK
HCLS1
HCST
HDGFRP3
HEG1
HENMT1
HEXA
HEYL
HHEX
HIGD1B
HLA-A
HLA-B
HLA-C
HLA-DMA
HLA-DMB
HLA-DOA
HLA-DPA1
HLA-DPB1
HLA-DRA
HLA-DRB3
HLA-F
HMCN1
HP
HPR
HSD17B6
HSPA12A
HSPA5
HSPB6
HTRA1
HTRA3
HYAL2
ICAM1
ICAM2
ICAM3
ID3
IDO1
IER5L
IFFO1
IFI16
IFI27
IFI27L2
IFI30
IFI35
IFI44
IFI44L
IFI6
IFIT2
IFIT3
IFITM1
IFITM2
IFITM3
IFITM4P
IFNGR2
IFRD2
IGF1
IGF2
IGFBP2
IGFBP3
IGFBP4
IGFBP7
IGFLR1
IGLL1
IGSF21
IGSF6
IL10RA
IL15
IL27RA
IL2RA
IL32
IL3RA
IL4R
IL6
ILK
INHBA
INMT
IRF1
IRF7
IRF8
IRF9
ISG15
ISG20
ISOC2
ITGA11
ITGA5
ITGA7
ITGA8
ITGAM
ITGB2
ITGBL1
JAM2
JAML
JCHAIN
KCNE4
KCNJ15
KCNJ8
KDELR2
KDELR3
KHDRBS3
KIAA1217
KLRB1
KPNA2
KRT14
KRT16
KRT25
KRT27
KRT33B
KRT34
KRT71
KRT74
KRT75
KRT81
KRT85
KRT86
KRTAP11-1
KRTAP12-1
KRTAP17-1
KRTAP2-1
KRTAP3-1
KRTAP3-2
KRTAP4-2
KRTAP4-4
KRTAP4-5
KRTAP9-3
KRTAP9-4
LAIR1
LAMA2
LAMA4
LAMB1
LAMC1
LAMP5
LAP3
LAPTM5
LASP1
LAT2
LAYN
LCP1
LCP2
LGALS1
LGALS2
LGALS3BP
LGALS9
LGALS9C
LGI2
LGMN
LHFPL2
LHPP
LHX6
LILRB2
LILRB3
LILRB5
LIMCH1
LIPA
LIX1L
LMCD1
LOX
LOXL1
LOXL2
LOXL3
LPL
LPXN
LRRC15
LRRC25
LRRC32
LRRC59
LRRN1
LRRN2
LRRN3
LSM10
LST1
LTB
LTBP2
LTF
LUM
LURAP1L
LY6E
LY86
LY96
LYL1
LYN
MAD2L2
MAGED1
MAOB
MAP1S
MAP3K3
MAPK11
MARCKS
MARCKSL1
MCAM
MCRIP1
MDK
ME3
MEF2C
MEGF6
MEST
METTL1
MFAP2
MFGE8
MFNG
MGLL
MICAL2
MICALL2
MIR503HG
MKX
MME
MMP11
MMP2
MMP23B
MMP9
MNDA
MPDZ
MPEG1
MPP1
MPRIP
MPV17
MRAP
MRAS
MRPS6
MS4A4A
MS4A6A
MS4A7
MSN
MSRB2
MSRB3
MT1F
MT2A
MTHFD1L
MVP
MX1
MX2
MXRA5
MXRA8
MYD88
MYH9
MYL12A
MYL6
MYL6B
MYL9
MYO1F
NAA10
NABP1
NACC2
NAPSA
NCF1
NCF4
NCKAP1L
NDUFB10
NEDD9
NEK6
NES
NEXN
NFKBIE
NGFR
NICN1
NID2
NINJ2
NKG7
NLGN2
NLRP3
NMB
NME4
NNMT
NOCT
NOTCH4
NOV
NOX4
NPC2
NPDC1
NPL
NR2F1
NR2F2
NREP
NRGN
NRP1
OAF
OAS1
OAS2
OAS3
OASL
OAZ1
ODC1
OLFML2B
OSBPL10
P3H1
P4HA3
P4HB
PACS1
PALD1
PALLD
PAPPA
PAPSS2
PARK7
PARM1
PARP12
PARP9
PARVA
PCDH12
PCDH17
PCED1B
PCNX1
PCOLCE
PCSK5
PDE1A
PDE7B
PDGFRB
PDIA4
PDLIM1
PDLIM7
PDPN
PDZRN3
PEA15
PECAM1
PENK
PFN1
PGF
PHLDB1
PHPT1
PIK3IP1
PIM2
PITPNM1
PKN1
PLA1A
PLA2G16
PLA2G2A
PLA2G4C
PLAC8
PLAT
PLAU
PLAUR
PLCE1
PLEK
PLEKHA4
PLEKHG2
PLEKHO1
PLEKHO2
PLIN1
PLOD1
PLPP1
PLPP4
PLPP7
PLPPR4
PLSCR1
PLSCR3
PLTP
PLVAP
PLXDC1
PLXND1
PMEPA1
PNMA1
POLE4
POLR2L
POPDC2
POSTN
POU2AF1
PPARG
PPIB
PPIC
PPM1F
PPP1R14A
PPP1R16B
PPP1R18
PPT1
PRAF2
PRCP
PRDX4
PREB
PRELID3A
PREX1
PRICKLE1
PRND
PROCR
PRRX1
PRSS23
PRSS53
PSAP
PSMB10
PSMB9
PSME2
PSTPIP1
PTGDS
PTGER4
PTGIR
PTK7
PTPRC
PTTG1IP
PTX3
PXDN
PYCR1
PYGL
RAB15
RAB23
RAB31
RAB32
RAB3C
RAB3IL1
RAB42
RAB43
RAC2
RAMP1
RAMP3
RARRES2
RARRES3
RASAL3
RASGRP2
RASGRP3
RASL12
RASSF2
RASSF4
RCN1
RCN3
RDH5
RELB
RFLNA
RFLNB
RFTN1
RGL1
RGMA
RGS1
RGS16
RGS18
RGS5
RHOC
RHOG
RILPL1
RIN3
RIPK3
RNASE1
RNASE6
RNASET2
RNF150
ROBO4
RPP25
RRAS
RRBP1
RSAD2
RSPO3
RTP4
RUNX1
S100A11
S100A8
S100A9
S1PR1
S1PR4
SAA1
SAA2
SAMD9L
SASH3
SBSPON
SCAMP5
SCG2
SCHIP1
SCN4B
SCO2
SDC2
SDF2L1
SDSL
SEC24D
SEC61A1
SELENOM
SELENON
SELP
SEPT11
SERPINA3
SERPINE1
SERPINE2
SERPINF1
SERPING1
SERPINH1
SFRP2
SFRP4
SH2B3
SH2D3C
SH3BP5
SH3PXD2B
SH3TC1
SHC1
SHISA5
SIPA1
SLAMF7
SLAMF8
SLC12A4
SLC15A3
SLC16A3
SLC1A3
SLC20A1
SLC2A5
SLC35C1
SLC38A6
SLC39A1
SLC39A13
SLC40A1
SLC43A2
SLC43A3
SLC6A6
SLC7A7
SLC8B1
SLCO2A1
SLCO2B1
SLFN11
SLIT2
SLN
SMARCD3
SMCO4
SMIM3
SMOC2
SMTN
SNRNP25
SNX10
SNX8
SOCS2
SOCS3
SOD2
SORCS2
SP110
SPARC
SPARCL1
SPHK1
SPON1
SPON2
SPP1
SPRR2G
SRD5A2
SRGN
SRM
SRPRB
SRPX
SRPX2
SSBP4
STAB1
STARD3NL
STARD8
STAT1
STAT2
STAT3
STC2
STEAP1
STMN2
STX2
SUGCT
SULF1
SULF2
SUSD1
SUSD6
SYK
SYNC
SYNDIG1
SYNPO2
SYT11
TAGLN
TAP1
TBC1D10C
TBCB
TBX2
TBXAS1
TEK
TGFB3
TGFBR2
THBS1
THBS3
THBS4
THEMIS2
THY1
TIE1
TIGAR
TIMD4
TIMP1
TIMP4
TINAGL1
TLR1
TLR2
TLR7
TM4SF1
TM4SF18
TMC6
TMED9
TMEM104
TMEM119
TMEM132A
TMEM140
TMEM173
TMEM176A
TMEM176B
TMEM184B
TMEM2
TMEM200A
TMEM204
TMEM37
TMEM88
TMEM8A
TMSB10
TNC
TNFAIP1
TNFRSF10B
TNFRSF11B
TNFRSF12A
TNFRSF17
TNFRSF1A
TNFRSF1B
TNFRSF21
TNFRSF4
TNFRSF6B
TNFSF10
TNFSF13B
TNFSF4
TNS1
TNS3
TOR4A
TP53I3
TPBG
TPM2
TPM4
TPST1
TPST2
TRAF3IP3
TRAM2
TRIB2
TRIM22
TRIM47
TRPV2
TSHZ3
TSPAN11
TSPAN4
TTYH3
TXNDC5
TYMP
TYROBP
UBA7
UBB
UBD
UBE2L6
UCP2
UNC93B1
VAMP5
VASH1
VAV1
VCAM1
VCAN
VEGFC
VKORC1
VLDLR
VOPP1
VSIG4
VWA1
VWCE
VWF
WARS
WDR6
WDR66
WFDC1
WIPF1
WIPI1
WISP1
WNT2
XAF1
YIF1A
YIPF3
YWHAH
ZBED2
ZCCHC24
ZMYND15
ZNF362
ZNF428
ZNF469
ZYX

## Sheet: Uninvolved (back)
dSSc	lSSc	Overlap
A2M	IRF9	IFI27
ARPC1B	ARHGAP4
C1orf162	IFI27
C1QTNF5	LCP1
CCL18	TAP1
CCL19
CENPP
COMP
DRAM1
FCGR1B
FCGR3A
FCN1
HP
IFI27
IFI30
IFI6
IFITM1
IFITM2
IFITM3
IFITM4P
LILRB3
MVP
PLEKHO1
PSMB9
PXDN
RARRES3
SOCS3
SULF1
THY1
TIMP1
UBD
