# Supplementary material
Source: HighWire-hosted journal article supplement (https://ard.bmj.com/content/78/6/817)
Supplement: inline-supplementary-material-4 [file inline-supplementary-material-4.xlsx]

## Sheet: Pathways
DataBase	Id	Name	Symbol	GeneSet
KEGG	04620	Toll-like receptor signaling pathway	TLR	AKT1,AKT2,CASP8,CD14,CD80,CD86,CD40,CHUK,MAP3K8,MAPK14,CTSK,FOS,IFNA1,IFNA2,IFNA4,IFNA5,IFNA6,IFNA7,IFNA8,IFNA10,IFNA13,IFNA14,IFNA16,IFNA17,IFNA21,IFNAR1,IFNAR2,IFNB1,IKBKB,IL1B,IL6,CXCL8,IL12A,IL12B,CXCL10,IRAK1,IRF3,IRF5,IRF7,JUN,LBP,CXCL9,MYD88,NFKB1,NFKBIA,PIK3CA,PIK3CB,PIK3CD,PIK3CG,PIK3R1,PIK3R2,MAPK1,MAPK3,MAPK8,MAPK11,MAPK9,MAPK10,MAPK13,MAP2K1,MAP2K2,MAP2K3,MAP2K6,MAP2K7,RAC1,RELA,MAPK1…
KEGG	04062	Chemokine signaling pathway	Chemokine	ADCY1,ADCY2,ADCY3,ADCY5,ADCY6,ADCY7,ADCY8,ADCY9,GRK2,GRK3,AKT1,AKT2,RHOA,ARRB1,ARRB2,CXCR5,BRAF,CDC42,CHUK,CCR1,CCR3,CCR4,CCR5,CCR6,CCR7,CCR8,CRK,CRKL,CSK,CX3CR1,DOCK2,PTK2B,FGR,FOXO3,GNAI1,GNAI2,GNAI3,GNB1,GNB2,GNB3,GNG3,GNG4,GNG5,GNG7,GNG10,GNG11,GNGT1,GNGT2,CCR10,XCR1,CXCR3,GRK4,GRK5,GRK6,GRB2,CXCL1,CXCL2,CXCL3,GSK3A,GSK3B,HCK,HRAS,IKBKB,CXCL8,CXCR1,CXCR2,CXCL10,ITK,JAK2,JAK3,KRAS,LYN,CXCL9,NF…
KEGG	04115	P53 signaling pathway	P53	APAF1,FAS,ATM,ATR,ADGRB1,BAX,CCND1,BID,CASP3,CASP8,CASP9,CCNB1,CCND2,CCND3,CCNE1,CCNG1,CCNG2,CDK1,CDK2,CDK4,CDK6,CDKN1A,CDKN2A,CHEK1,DDB2,GADD45A,SFN,IGF1,IGFBP3,CD82,MDM2,MDM4,GADD45B,SERPINE1,SERPINB5,PMAIP1,PTEN,RRM2,SIAH1,THBS1,TP53,TP73,TSC2,PPM1D,TNFRSF10B,CCNB2,CCNE2,EI24,TP53I3,GADD45G,CHEK2,RCHY1,BBC3,SESN1,RRM2B,SHISA5,GTSE1,CYCS,STEAP3,PIDD1,RPRM,TP53AIP1,PERP,COP1,ZMAT3,SESN2,CCNB3,SE…
KEGG	04621	NOD-like receptor signaling pathway	NOD	BIRC2,BIRC3,XIAP,CASP1,CASP5,CASP8,CHUK,MAPK14,CXCL1,CXCL2,HSP90AA1,HSP90AB1,IKBKB,IL1B,IL6,CXCL8,IL18,MEFV,NAIP,NFKB1,NFKBIA,NFKBIB,MAPK1,MAPK3,MAPK8,MAPK11,MAPK9,MAPK10,MAPK13,RELA,MAPK12,CCL2,CCL5,MAP3K7,TNF,TNFAIP3,HSP90B1,TRAF6,TRIP6,IKBKG,RIPK2,PSTPIP1,NOD1,TAB1,SUGT1,NLRP1,CARD8,TAB2,PYCARD,ERBIN,NLRC4,CARD18,NOD2,CARD9,CARD6,NLRP3,TAB3,PYDC1
KEGG	04630	JAK-STAT signaling pathway	JAKSTAT	AKT1,AKT2,CCND1,BCL2L1,CBL,CBLB,CCND2,CCND3,CISH,CNTF,CNTFR,CREBBP,CSF2,CSF2RA,CSF2RB,CSF3,CSF3R,CSH1,CTF1,EP300,EPO,EPOR,GH1,GH2,GHR,GRB2,IFNA1,IFNA2,IFNA4,IFNA5,IFNA6,IFNA7,IFNA8,IFNA10,IFNA13,IFNA14,IFNA16,IFNA17,IFNA21,IFNAR1,IFNAR2,IFNB1,IFNG,IFNGR1,IFNGR2,IFNW1,IL2,IL2RA,IL2RB,IL2RG,IL3,IL3RA,IL4,IL4R,IL5,IL5RA,IL6,IL6R,IL6ST,IL7,IL7R,IL9,IL9R,IL10,IL10RA,IL10RB,IL11,IL11RA,IL12A,IL12B,IL12…
KEGG	04664	Fc-epsilon RI signaling pathway	FcERI	AKT1,AKT2,BTK,MAPK14,CSF2,FCER1A,MS4A2,FCER1G,FYN,GRB2,HRAS,IL3,IL4,IL5,IL13,INPP5D,KRAS,LCP2,LYN,NRAS,PDK1,PIK3CA,PIK3CB,PIK3CD,PIK3CG,PIK3R1,PIK3R2,PLA2G1B,PLA2G2A,PLA2G4A,PLA2G5,PLCG1,PLCG2,PRKCA,PRKCB,PRKCD,PRKCE,MAPK1,MAPK3,MAPK8,MAPK11,MAPK9,MAPK10,MAPK13,MAP2K1,MAP2K2,MAP2K3,MAP2K6,MAP2K7,RAC1,RAC2,RAC3,RAF1,MAPK12,MAP2K4,SOS1,SOS2,SYK,TNF,VAV1,VAV2,PLA2G6,PLA2G10,PIK3R3,JMJD7-PLA2G4B,GAB2…
KEGG	04350	TGF-beta signaling pathway	TGFb	ACVR1,ACVR2A,ACVR2B,AMH,AMHR2,RHOA,BMP2,BMP4,BMP5,BMP6,BMP7,BMP8B,BMPR1A,BMPR1B,BMPR2,CDKN2B,COMP,CREBBP,DCN,E2F4,E2F5,EP300,ID1,ID2,ID3,ID4,IFNG,INHBA,INHBB,INHBC,LTBP1,SMAD1,SMAD2,SMAD3,SMAD4,SMAD5,SMAD6,SMAD7,SMAD9,MYC,NODAL,PITX2,PPP2CA,PPP2CB,PPP2R1A,PPP2R1B,MAPK1,MAPK3,RBL1,RBL2,ROCK1,RPS6KB1,RPS6KB2,SKP1,SP1,TFDP1,TGFB1,TGFB2,TGFB3,LEFTY2,TGFBR1,TGFBR2,THBS1,THBS2,THBS3,THBS4,TNF,GDF5,CUL1…
KEGG	04622	RIG-I-like receptor signaling pathway	RIGIR	CASP8,CASP10,CHUK,MAPK14,CYLD,DDX3X,IFNA1,IFNA2,IFNA4,IFNA5,IFNA6,IFNA7,IFNA8,IFNA10,IFNA13,IFNA14,IFNA16,IFNA17,IFNA21,IFNB1,IFNW1,IKBKB,CXCL8,IL12A,IL12B,CXCL10,IRF3,IRF7,MAP3K1,NFKB1,NFKBIA,NFKBIB,PIN1,MAPK8,MAPK11,MAPK9,MAPK10,MAPK13,RELA,MAPK12,MAP3K7,TNF,TRAF2,TRAF3,TRAF6,TRIM25,IKBKG,DDX3Y,TRADD,RIPK1,FADD,ATG12,ATG5,ISG15,IKBKE,TBKBP1,TANK,DDX58,TKFC,TBK1,RNF125,OTUD5,IFNK,MAVS,IFIH1,AZI2…
KEGG	04010	MAPK signaling pathway	MAPK	AKT1,AKT2,FAS,FASLG,ARRB1,ARRB2,ATF4,BDNF,BRAF,CACNA1A,CACNA1B,CACNA1C,CACNA1D,CACNA1E,CACNA1F,CACNA1S,CACNA2D1,CACNB1,CACNB2,CACNB3,CACNB4,CACNG1,CASP3,CD14,CDC25B,CDC42,CHUK,MAP3K8,ATF2,CRK,CRKL,MAPK14,DAXX,GADD45A,DDIT3,DUSP1,DUSP2,DUSP3,DUSP4,DUSP5,DUSP6,DUSP7,DUSP8,DUSP9,EGF,EGFR,ELK1,ELK4,MECOM,FGF1,FGF2,FGF3,FGF4,FGF5,FGF6,FGF7,FGF8,FGF9,FGF10,FGF11,FGF12,FGF13,FGF14,FGFR1,FGFR3,FGFR2,FGFR…
KEGG	04662	B cell receptor signaling pathway	BCR	AKT1,AKT2,BTK,CD19,CD22,CD72,CD79A,CD79B,CD81,CHUK,CR2,FCGR2B,FOS,GRB2,GSK3B,HRAS,IKBKB,INPP5D,JUN,KRAS,LYN,NFATC1,NFATC2,NFATC3,NFATC4,NFKB1,NFKBIA,NFKBIB,NFKBIE,NRAS,PIK3CA,PIK3CB,PIK3CD,PIK3CG,PIK3R1,PIK3R2,PLCG2,PPP3CA,PPP3CB,PPP3CC,PPP3R1,PPP3R2,PRKCB,MAPK1,MAPK3,MAP2K1,MAP2K2,PTPN6,RAC1,RAC2,RAC3,RAF1,RELA,SOS1,SOS2,SYK,VAV1,VAV2,PIK3R3,IKBKG,IFITM1,BCL10,AKT3,VAV3,NFAT5,MALT1,LILRB3,CHP1,P…
KEGG	04370	VEGF signaling pathway	VEGF	AKT1,AKT2,BAD,CASP9,CDC42,MAPK14,HRAS,HSPB1,KDR,KRAS,NFATC1,NFATC2,NFATC3,NFATC4,NOS3,NRAS,PIK3CA,PIK3CB,PIK3CD,PIK3CG,PIK3R1,PIK3R2,PLA2G1B,PLA2G2A,PLA2G4A,PLA2G5,PLCG1,PLCG2,PPP3CA,PPP3CB,PPP3CC,PPP3R1,PPP3R2,PRKCA,PRKCB,PRKCG,MAPK1,MAPK3,MAPK11,MAPK13,MAP2K1,MAP2K2,PTGS2,PTK2,PXN,RAC1,RAC2,RAC3,RAF1,MAPK12,SRC,VEGFA,MAPKAPK3,PLA2G6,PLA2G10,PIK3R3,JMJD7-PLA2G4B,SPHK1,SH2D2A,MAPKAPK2,AKT3,NFAT5,…
KEGG	04150	mTOR signaling pathway	mTOR	AKT1,AKT2,BRAF,EIF4B,EIF4E,EIF4EBP1,VEGFD,MTOR,HIF1A,IGF1,INS,PDPK1,PGF,PIK3CA,PIK3CB,PIK3CD,PIK3CG,PIK3R1,PIK3R2,PRKAA1,PRKAA2,MAPK1,MAPK3,RHEB,RPS6,RPS6KA1,RPS6KA2,RPS6KA3,RPS6KB1,RPS6KB2,STK11,TSC1,TSC2,VEGFA,VEGFB,VEGFC,ULK1,PIK3R3,EIF4E2,ULK2,AKT3,PIK3R5,ULK3,RPS6KA6,CAB39,DDIT4,RPTOR,MLST8,CAB39L,STRADA,RICTOR,EIF4E1B
KEGG	03320	PPAR signaling pathway	PPAR	ACAA1,ACADL,ACADM,ACOX1,APOA1,APOA2,APOC3,AQP7,CD36,CPT1A,CPT1B,CPT2,CYP4A11,CYP7A1,CYP8B1,CYP27A1,DBI,EHHADH,FABP4,FABP1,FABP2,FABP3,FABP5,FABP6,FABP7,ACSL1,ACSL3,ACSL4,GK,GK2,HMGCS2,ILK,LPL,ME1,MMP1,OLR1,PCK1,PCK2,PDPK1,PLIN1,PLTP,PPARA,PPARD,PPARG,RXRA,RXRB,RXRG,SCD,SCP2,UBC,UCP1,ACOX2,ACOX3,ADIPOQ,FADS2,NR1H3,SORBS1,SLC27A5,SLC27A4,SLC27A2,ACSL6,SLC27A6,ANGPTL4,ACSL5,SCD5,ACSBG2,APOA5,CPT1C,C…
KEGG	04310	Wnt signaling pathway	Wnt	APC,RHOA,CCND1,CAMK2A,CAMK2B,CAMK2D,CAMK2G,CCND2,CCND3,CREBBP,CSNK1A1,CSNK1E,CSNK2A1,CSNK2A2,CSNK2B,CTBP1,CTBP2,CTNNB1,DVL1,DVL2,DVL3,EP300,FZD2,GSK3B,JUN,LRP6,LRP5,SMAD2,SMAD3,SMAD4,MMP7,MYC,NFATC1,NFATC2,NFATC3,NFATC4,PLCB2,PLCB3,PLCB4,PPARD,PPP2CA,PPP2CB,PPP2R1A,PPP2R1B,PPP2R5A,PPP2R5B,PPP2R5C,PPP2R5D,PPP2R5E,PPP3CA,PPP3CB,PPP3CC,PPP3R1,PPP3R2,PRKACA,PRKACB,PRKACG,PRKCA,PRKCB,PRKCG,MAPK8,MAPK9…
KEGG	04066	HIF-1 signaling pathway	HIF	IL6,IL6R,STAT3,TLR4,IFNG,IFNGR1,IFNGR2,RELA,NFKB1,INS,EGF,IGF1,INSR,EGFR,IGF1R,ERBB2,MAP2K1,MAP2K2,MAPK1,MAPK3,MKNK1,MKNK2,PIK3CA,PIK3CD,PIK3CB,PIK3R1,PIK3R2,PIK3R3,AKT1,AKT2,AKT3,MTOR,EIF4EBP1,EIF4E,EIF4E2,EIF4E1B,RPS6KB1,RPS6KB2,RPS6,HIF1A,VHL,RBX1,ELOC,ELOB,CUL2,EGLN1,EGLN3,EGLN2,ARNT,CREBBP,EP300,CYBB,PLCG1,PLCG2,PRKCA,PRKCB,PRKCG,CAMK2A,CAMK2D,CAMK2B,CAMK2G,TIMP1,LTBR,EPO,TF,TFRC,VEGFA,FLT1,…
KEGG	04330	Notch signaling pathway	Notch	JAG1,CREBBP,CTBP1,CTBP2,DTX1,DVL1,DVL2,DVL3,EP300,KAT2A,HDAC1,HDAC2,HES1,RBPJ,JAG2,LFNG,MFNG,NOTCH1,NOTCH2,NOTCH3,NOTCH4,PSEN1,PSEN2,RFNG,ADAM17,NUMB,KAT2B,NUMBL,CIR1,NCOR2,MAML1,DLL3,RBPJL,SNW1,DTX4,NCSTN,DLL1,APH1A,DLL4,MAML3,PSENEN,MAML2,DTX2,DTX3L,PTCRA,DTX3,HES5
KEGG	04340	Hedgehog signaling pathway	Hedgehog	BMP2,BMP4,BMP5,BMP6,BMP7,BMP8B,CSNK1A1,CSNK1D,CSNK1E,CSNK1G2,CSNK1G3,GAS1,GLI1,GLI2,GLI3,GSK3B,IHH,LRP2,PRKACA,PRKACB,PRKACG,PRKX,PTCH1,SHH,SMO,WNT1,WNT2,WNT3,WNT5A,WNT6,WNT7A,WNT7B,WNT8A,WNT8B,WNT10B,WNT11,WNT2B,WNT9A,WNT9B,ZIC2,PTCH2,BTRC,FBXW11,STK36,DHH,WNT16,SUFU,RAB23,CSNK1G1,WNT4,HHIP,WNT10A,WNT5B,WNT3A,CSNK1A1L,BMP8A
KEGG	04390	Hippo signaling pathway	Hippo	CRB2,CRB1,PARD3,PARD6A,PARD6G,PARD6B,PRKCZ,PRKCI,PATJ,MPP5,AMOT,YAP1,WWTR1,CDH1,LIMD1,AJUBA,WTIP,NF2,WWC1,FRMD1,FRMD6,SAV1,STK3,RASSF6,RASSF1,PPP2CA,PPP2CB,PPP2R1B,PPP2R1A,PPP2R2A,PPP2R2B,PPP2R2C,PPP2R2D,LATS2,LATS1,MOB1A,MOB1B,PPP1CA,PPP1CB,PPP1CC,TP53BP2,LLGL2,LLGL1,SCRIB,DLG1,DLG4,DLG2,DLG3,CSNK1D,CSNK1E,TPTEP2-CSNK1E,BTRC,FBXW11,TP73,BBC3,TEAD1,TEAD4,TEAD3,TEAD2,CTGF,GLI2,AREG,BIRC5,AFP,ITGB2…
KEGG	04371	Apelin signaling pathway	Apelin	ADCY1,ADCY2,ADCY3,ADCY4,ADCY5,ADCY6,ADCY7,ADCY8,ADCY9,ADCY10,PRKACA,PRKACB,PRKACG,LIPE,APLN,APLNR,GNAI1,GNAI3,GNAI2,GNB1,GNB2,GNB3,GNB4,GNB5,GNG2,GNG3,GNG4,GNG5,GNG7,GNG8,GNG10,GNG11,GNG12,GNG13,GNGT1,GNGT2,GNAQ,PLCB1,PLCB2,PLCB3,PLCB4,ITPR1,ITPR2,ITPR3,RYR1,RYR2,RYR3,CALML3,CALM2,CALM3,CALM1,CALML6,CALML5,CALML4,NOS1,NOS2,NOS3,PRKCE,SLC9A1,SLC8A1,SLC8A2,SLC8A3,MYLK,MYLK2,MYLK3,MYLK4,MYL2,MYL3,MY…
KEGG	04071	Sphingolipid signaling pathway	Sphingolipid	SPTLC1,SPTLC2,SPTLC3,CERS2,CERS3,CERS6,CERS1,CERS4,CERS5,DEGS1,DEGS2,SMPD1,SGMS1,SGMS2,TNF,TNFRSF1A,NSMAF,SMPD2,ASAH1,ASAH2,ACER2,ACER1,TRADD,TRAF2,CTSD,BID,BAX,MAP3K5,MAPK8,MAPK10,MAPK9,MAPK11,MAPK12,MAPK13,MAPK14,PRKCZ,AKT1,AKT2,AKT3,BCL2,PPP2CA,PPP2CB,PPP2R1B,PPP2R1A,PPP2R2A,PPP2R2B,PPP2R2C,PPP2R2D,PPP2R3B,PPP2R3C,PPP2R3A,PPP2R5B,PPP2R5C,PPP2R5D,PPP2R5E,PPP2R5A,TP53,FCER1A,MS4A2,FCER1G,FYN,GAB…
KEGG	04151	PI3K-Akt signaling pathway	PI3KAKT	EGF,TGFA,EREG,AREG,FGF1,FGF2,FGF3,FGF4,FGF17,FGF6,FGF7,FGF8,FGF9,FGF10,FGF16,FGF5,FGF18,FGF20,FGF22,FGF19,FGF21,FGF23,NGF,BDNF,NTF3,NTF4,INS,IGF1,IGF2,PDGFA,PDGFB,PDGFC,PDGFD,CSF1,KITLG,FLT3LG,VEGFA,VEGFB,PGF,VEGFC,VEGFD,HGF,ANGPT1,ANGPT2,ANGPT4,EFNA1,EFNA2,EFNA3,EFNA4,EFNA5,EGFR,ERBB2,ERBB3,ERBB4,FGFR1,FGFR2,FGFR3,FGFR4,NGFR,NTRK1,NTRK2,INSR,IGF1R,PDGFRA,PDGFRB,CSF1R,KIT,FLT3,FLT1,FLT4,KDR,MET,T…
KEGG	04657	IL-17 signaling pathway	IL17	IL25,IL17RA,IL17RB,TRADD,FADD,CASP3,CASP8,TRAF3IP2,TRAF6,NFKB1,RELA,FOS,FOSB,JUN,JUND,FOSL1,IL4,IL5,IL13,CCL17,CCL11,IL17A,IL17F,IL17RC,TRAF3,ANAPC5,TNFAIP3,HSP90AA1,HSP90AB1,HSP90B1,TBK1,TAB2,TAB3,MAP3K7,IKBKG,CHUK,IKBKB,NFKBIA,MAPK11,MAPK12,MAPK13,MAPK14,MAPK8,MAPK10,MAPK9,MAPK1,MAPK3,MAPK4,MAPK6,MAPK7,MAPK15,CEBPB,TRAF4,IKBKE,USP25,TRAF5,TRAF2,SRSF1,ELAVL1,GSK3B,CXCL1,CXCL2,CXCL3,CXCL5,CXCL6,C…
KEGG	00532	Glycosaminoglycan biosynthesis - chondroitin sulfate / dermatan sulfate	GAG_bios_CSDS	CHST3,UST,B4GALT7,CHSY1,B3GAT3,B3GAT1,DSE,CHST11,CHST15,CHPF2,CSGALNACT2,CHST12,CSGALNACT1,CHST7,XYLT1,XYLT2,CHPF,CHST14,B3GALT6,B3GAT2,CHST13,CHSY3
KEGG	00534	Glycosaminoglycan biosynthesis - heparan sulfate / heparin	GAG_bios_HS	EXT1,EXT2,EXTL1,EXTL2,EXTL3,NDST1,NDST2,NDST3,HS6ST1,HS2ST1,HS3ST3B1,HS3ST3A1,HS3ST2,HS3ST1,B4GALT7,GLCE,B3GAT3,B3GAT1,XYLT1,XYLT2,NDST4,HS6ST2,B3GALT6,B3GAT2,HS3ST5,HS6ST3
KEGG	00533	Glycosaminoglycan biosynthesis - keratan sulfate	GAG_bios_KS	FUT8,B4GALT1,CHST6,ST3GAL1,ST3GAL2,ST3GAL3,CHST1,B4GALT4,B4GALT3,B4GALT2,CHST2,CHST4,B3GNT2,B4GAT1,B3GNT7
Reactome	R-HSA-186797	Signaling by PDGF	PDGF	HRAS,PDGFD,COL6A1,COL6A2,STAT1,COL4A4,THBS1,RAPGEF1,RASA1,COL4A3,COL9A1,PLAT,CRK,CRKL,COL4A5,PTPN12,COL9A3,THBS2,PLCG1,COL3A1,STAT6,COL5A2,KRAS,SOS1,COL2A1,PIK3R1,FURIN,PDGFRA,COL5A1,BCAR1,GRB7,COL6A5,COL6A6,NCK2,PDGFB,COL9A2,STAT5B,STAT5A,THBS4,PLG,PDGFRB,PIK3R2,STAT3,NCK1,PTPN11,SPP1,COL5A3,PIK3CB,NRAS,COL4A2,COL4A1,PIK3CA,COL6A3,THBS3
Reactome	R-HSA-913531	Interferon signaling	IFN	B2M,NUP93,HLA-DPB1,HLA-DPA1,IRF9,HLA-E,ICAM1,MID1,RSAD2,IRF1,CIITA,PTPN1,EIF2AK2,RPS27A,TRIM35,MAPK3,IFNGR2,STAT1,TRIM38,NUP153,TRIM31,IRF3,IRF7,SAMHD1,RANBP2,KPNA5,TRIM10,TRIM14,IRF4,DDX58,TYK2,EGR1,TRIM26,IP6K2,KPNA3,NUPL2,HLA-DQA2,HLA-B,HLA-DQB2,HLA-DRA,HLA-C,RAE1,NUP214,CD44,HLA-DRB5,SOCS1,HLA-DRB1,IFITM1,IFITM2,HLA-DQA1,MT2A,IFITM3,JAK2,KPNA7,PSMB8,NUP160,IFIT1,IFIT2,IFIT3,TRIM25,KPNA2,HLA-D…
Reactome	R-HSA-909733	Interferon alpha beta signaling	IFNab	IRF9,HLA-E,RSAD2,IRF1,PTPN1,IRF3,IRF7,SAMHD1,IRF4,TYK2,EGR1,IP6K2,HLA-B,HLA-C,SOCS1,IFITM1,IFITM2,IFITM3,PSMB8,IFIT1,IFIT2,IFIT3,IFNB1,XAF1,HLA-F,HLA-G,IFNA21,IFNA4,IFNA7,IFNA14,IFNA10,IFNA17,IFNA16,HLA-A,IFNA5,IFNA6,IFNA13,IFNA2,IFNA8,IFNA1,USP18,MX2,PTPN6,MX1,BST2,OASL,STAT2,SOCS3,ISG15,RNASEL,IFI35,IFI6,IRF5,ABCE1,IRF2,PTPN11,IRF8,OAS1,OAS2,OAS3,IRF6,GBP2,IFNAR1,ISG20,ADAR,JAK1
Reactome	R-HSA-877300	Interferon gamma signaling	IFNg	B2M,HLA-DPB1,HLA-DPA1,IRF9,HLA-E,ICAM1,MID1,IRF1,CIITA,PTPN1,TRIM35,IFNGR2,TRIM38,TRIM31,IRF3,IRF7,TRIM10,TRIM14,IRF4,TRIM26,HLA-DQA2,HLA-B,HLA-DQB2,HLA-DRA,HLA-C,CD44,HLA-DRB5,SOCS1,HLA-DRB1,HLA-DQA1,MT2A,JAK2,TRIM25,HLA-DQB1,HLA-F,HLA-G,HLA-A,TRIM21,PTPN6,TRIM8,HLA-DRB3,CAMK2G,TRIM48,TRIM29,CAMK2B,PML,SUMO1,NCAM1,OASL,TRIM68,SOCS3,VCAM1,TRIM62,TRIM6,TRIM5,TRIM22,TRIM34,TRIM3,PRKCD,SP100,TRIM17,…
Reactome	R-HSA-1474244	Extracellular matrix organization	Matrix	NCAN,CAPN6,GDF5,ICAM4,COL6A1,ICAM1,LAMA3,VCAN,EFEMP2,ADAM19,ITGA4,COL12A1,CRTAP,MATN3,P3H3,HAPLN1,LRP4,LOXL4,ADAM17,ITGAM,ACTN1,ICAM5,CAPN15,PRKCA,LTBP4,SDC1,ICAM3,COL6A2,ITGAE,ITGA1,ITGAX,ITGA2,CAST,MFAP2,MMP16,EMILIN1,CTSB,ITGAD,COL4A4,PLEC,LAMA5,THBS1,TNXB,BMP7,LAMC3,VTN,COL4A3,COL4A6,COL19A1,FBLN5,MUSK,ITGB8,COL9A1,CD44,BMP4,COL11A2,TTR,CAPNS1,MMP14,MMP2,CAPN10,COL1A2,TIMP2,ITGB4,CTSD,TIMP1,L…
Reactome	R-HSA-400685	SEMA4D in semaphorin signaling	SEMA	MYH11,RRAS,RND1,RHOB,ROCK2,PLXNB1,MYH14,ROCK1,RAC1,LIMK1,RHOA,ARHGAP35,MYL12B,ARHGEF11,ERBB2,ARHGEF12,MYL6,MYL9,MYH10,RHOC,LIMK2,SEMA4D,MET,MYH9
Reactome	R-HSA-1630316	Glycosaminoglycan metabolism	GAG_meta	CHST14,DSE,NCAN,GLB1,VCAN,HS3ST6,HS3ST2,XYLT1,B3GNT2,SDC1,HGSNAT,GPC1,HS6ST3,B3GALT6,HPSE2,HS6ST1,SLC35B3,HS3ST3A1,CD44,HAS1,CHPF,B4GALT6,HS3ST3B1,GLB1L,B3GAT3,GPC5,GPC6,BGN,DSEL,B4GALT1,HS3ST1,HAS3,NDST1,B3GAT1,GALNS,HS3ST4,B4GAT1,CSPG5,HYAL1,HYAL2,CHSY3,HEXB,HAS2,CHST3,SLC35B2,PAPSS2,HS6ST2,GPC4,CHP1,ST3GAL4,GUSB,GPC3,B3GAT2,CHSY1,IDS,SGSH,SDC2,CSGALNACT1,BCAN,CSGALNACT2,NDST2,B4GALT5,LYVE1,B4G…
Reactome	R-HSA-1638074	Keratan sulfate keratin metabolism	KS_meta	GLB1,B3GNT2,B4GALT6,GLB1L,B4GALT1,GALNS,B4GAT1,HEXB,ST3GAL4,B4GALT5,SLC35D2,B4GALT3,B4GALT4,B3GNT3,OMD,OGN,ST3GAL1,CHST6,B3GNT4,CHST5,ST3GAL2,B4GALT2,FMOD,PRELP,CHST1,HEXA,CHST2,ST3GAL6,B3GNT7,GNS,KERA,LUM,ST3GAL3
Reactome	R-HSA-2022854	Keratan sulfate biosynthesis	KS_bios	B3GNT2,B4GALT6,B4GALT1,B4GAT1,ST3GAL4,B4GALT5,SLC35D2,B4GALT3,B4GALT4,B3GNT3,OMD,OGN,ST3GAL1,CHST6,B3GNT4,CHST5,ST3GAL2,B4GALT2,FMOD,PRELP,CHST1,CHST2,ST3GAL6,B3GNT7,KERA,LUM,ST3GAL3
Reactome	R-HSA-1474290	Collagen formation	COL	COL6A1,LAMA3,COL12A1,CRTAP,P3H3,LOXL4,COL6A2,CTSB,COL4A4,PLEC,COL4A3,COL4A6,COL19A1,COL9A1,COL11A2,COL1A2,ITGB4,ITGA6,PPIB,PXDN,COL4A5,CD151,COL9A3,COL14A1,TLL2,LOXL1,COL3A1,COL7A1,COL5A2,COL27A1,PCOLCE,LOXL3,SERPINH1,COL2A1,COL15A1,COL28A1,LAMC2,COL8A2,COLGALT2,BMP1,COL5A1,ADAMTS3,COL21A1,P4HA1,COL11A1,P4HA2,MMP9,COL20A1,COL6A5,COL17A1,LOX,COL6A6,P4HA3,CTSV,COL13A1,PLOD1,CTSL,P3H2,ADAMTS2,COL25A…
Reactome	R-HSA-1638091	Heparan sulfate heparin metabolism	HS_meta	NCAN,GLB1,VCAN,HS3ST6,HS3ST2,XYLT1,SDC1,HGSNAT,GPC1,HS6ST3,B3GALT6,HPSE2,HS6ST1,HS3ST3A1,HS3ST3B1,GLB1L,B3GAT3,GPC5,GPC6,BGN,HS3ST1,NDST1,B3GAT1,HS3ST4,CSPG5,HS6ST2,GPC4,GUSB,GPC3,B3GAT2,IDS,SGSH,SDC2,BCAN,NDST2,B4GALT7,AGRN,SLC35D2,EXT2,IDUA,CSPG4,HPSE,NDST3,SDC4,HSPG2,EXT1,HS2ST1,SDC3,XYLT2,NAGLU,GPC2,DCN,HS3ST5,NDST4,GLCE
Reactome	R-HSA-1793185	Chondroitin sulfate dermatan sulfate metabolism	CSDS_meta	CHST14,DSE,NCAN,VCAN,XYLT1,SDC1,GPC1,B3GALT6,CHPF,B3GAT3,GPC5,GPC6,BGN,DSEL,B3GAT1,CSPG5,HYAL1,CHSY3,HEXB,CHST3,GPC4,GPC3,B3GAT2,CHSY1,IDS,SDC2,CSGALNACT1,BCAN,CSGALNACT2,B4GALT7,UST,AGRN,CHST15,ARSB,IDUA,CSPG4,CHST7,CHPF2,CHST12,HEXA,SDC4,HSPG2,CHST13,SDC3,XYLT2,GPC2,HYAL3,DCN,CHST11
Reactome	R-HSA-2022870	Chondroitin sulfate biosynthesis	CS_bios	NCAN,VCAN,CHPF,BGN,CSPG5,CHSY3,CHST3,CHSY1,CSGALNACT1,BCAN,CSGALNACT2,CHST15,CSPG4,CHST7,CHPF2,CHST12,CHST13,DCN,CHST11
Reactome	R-HSA-2142845	Hyaluronan metabolism	HA_meta	CD44,HAS1,HAS3,HYAL1,HYAL2,HEXB,HAS2,CHP1,GUSB,LYVE1,CEMIP,HEXA,HMMR,ABCC5,HYAL3,STAB2,SLC9A1
Reactome	R-HSA-2022923	Dermatan sulfate biosynthesis	DS_bios	CHST14,DSE,NCAN,VCAN,BGN,DSEL,CSPG5,BCAN,UST,CSPG4,DCN

## Sheet: PathwayActivationScore_matrix
ID	Pathway	GSM1145868	GSM1145870	GSM1145871	GSM1145875	GSM1145876	GSM1145877	GSM1145878	GSM1145880	GSM1145881	GSM1145882	GSM1145883	GSM1145884	GSM1145885	GSM1145886	GSM1145887	GSM1145888	GSM1145889	GSM1145891	GSM1145892	GSM1145893	GSM1145894	GSM1145895	GSM1145896	GSM1145897	GSM1145898	GSM1145899	GSM1145901	GSM1145904	GSM1145905	GSM1145906	GSM1145907	GSM1145908	GSM1145912	GSM1145914	GSM1145915	GSM1145916	GSM1145917	GSM1145919	GSM1145921	GSM1145922	GSM1145926	GSM1400699	GSM1400708	GSM1400722	GSM1400724	GSM1400726	GSM1400731	GSM1619594
TLR	Toll-like receptor signaling pathway	-1.29642	-0.629009	-0.810557	-1.18691	-0.686072	-0.843382	-1.03155	-1.08292	0.197401	-0.907456	0.257323	-0.547446	-1.09063	-0.817532	-0.883114	-0.129393	-0.263136	-0.780633	-0.482959	-0.977889	0.517841	-1.4808	-1.20558	-1.18047	-0.123593	-1.16076	-0.770506	-0.744927	-0.183515	-0.962642	-0.394589	-0.571051	-1.1791	-0.771818	-0.994789	0.0606375	-1.109	-0.687755	-0.640356	-0.702411	-0.211231	-1.21792	-1.1706	-0.79182	-0.293421	-1.20621	-0.6967	-0.230212
Chemokine	Chemokine signaling pathway	-1.22683	-0.556291	-0.638546	-1.13866	0.141958	-0.212697	-1.11913	-0.469357	1.11217	-0.609041	1.33477	0.0856107	-0.418523	-0.190896	-0.553037	0.410751	0.895659	0.0521599	-0.300621	-0.379332	1.25321	-1.30154	-0.777043	-0.535017	0.58197	-0.437723	-0.793161	-0.545268	0.160728	-1.34508	0.36571	0.108542	-0.45116	-1.06399	-0.584732	1.26973	-0.78681	-0.234531	-0.166286	0.346516	0.536735	-1.27995	-0.661727	-0.243404	-0.162409	-1.03767	0.253114	-0.106786
P53	P53 signaling pathway	1.72849	1.65571	1.42437	1.37391	1.79134	1.41477	1.42885	1.5312	1.59754	1.79683	1.62395	1.53823	1.61531	1.48086	1.58563	1.49504	1.41112	1.90903	2.03847	1.5688	1.90915	1.56562	1.29387	1.27903	1.72217	1.87314	1.7489	1.53135	2.17112	1.75357	1.72509	1.43988	1.88733	1.97099	1.70829	1.7352	1.6851	1.24789	2.519	1.62572	2.11524	1.75652	1.91893	1.69937	2.08793	1.6966	1.96444	2.14572
NOD	NOD-like receptor signaling pathway	1.95603	1.84091	1.99583	1.34211	2.08992	1.52621	1.9429	1.25481	2.14693	1.53523	1.71536	1.6869	1.98983	1.88153	1.42368	1.6379	1.78132	2.43858	2.08287	1.5633	2.30607	1.58484	1.50803	1.60431	2.42819	1.56818	2.06373	1.44953	2.58517	1.81298	1.76711	1.3769	1.58037	1.60849	1.87797	2.32417	1.78959	1.59848	1.98235	1.64866	1.93377	1.69304	1.72975	2.08613	1.93683	1.44272	2.08642	2.0831
JAKSTAT	JAK-STAT signaling pathway	-4.06122	-3.85978	-3.65449	-4.15526	-3.36647	-3.81066	-3.78047	-3.711	-3.28958	-3.86922	-3.05128	-3.63446	-3.69494	-3.43251	-3.81227	-3.40908	-3.39804	-3.63042	-3.81787	-4.11437	-3.52595	-4.39082	-3.82458	-4.05215	-3.58564	-3.70962	-3.76548	-3.97742	-3.59449	-4.21151	-3.48575	-3.83834	-3.71782	-3.80894	-4.12483	-3.4243	-4.00092	-3.79424	-3.65175	-3.79846	-3.4933	-4.01756	-3.70779	-3.72261	-3.99997	-3.60711	-3.62755	-3.73363
FcERI	Fc-epsilon RI signaling pathway	-0.699198	-0.709574	-0.89869	-1.21087	-0.709107	-0.453972	-1.11386	-0.831503	-0.082037	-0.74736	0.0327345	-0.584739	-0.55167	-0.356513	-0.641861	-0.125385	-0.361531	-0.334164	-0.856028	-0.589091	-0.325087	-0.921409	-0.490788	-0.991021	-0.293322	-0.559924	-0.6202	-0.482184	-0.33296	-0.833494	0.12411	-0.532694	-0.228214	-0.682709	-0.487072	0.211658	-0.982282	-0.408701	-0.186265	-0.0270105	-0.396184	-1.11088	-1.06343	-0.817114	-0.557079	-1.18052	-0.111461	-0.30279
TGFb	TGF-beta signaling pathway	1.12668	0.146705	0.638997	1.75008	1.87823	1.6733	0.186792	1.73612	2.18412	2.15997	2.18332	1.84383	0.758108	1.04922	1.67618	1.95646	1.63248	1.80374	1.42771	0.802054	1.7801	1.27603	1.49686	1.09863	1.42932	1.84837	1.49322	0.853757	1.03648	1.02056	1.34532	1.22158	1.59905	1.5544	1.14563	0.968047	1.35444	1.75198	2.21683	1.32354	1.88425	1.07255	1.97713	1.16223	1.69347	1.68692	1.61891	2.07693
RIGIR	RIG-I-like receptor signaling pathway	-0.264705	0.62034	-0.231405	-0.60893	0.212363	-0.049215	0.316563	-0.501239	0.0243773	-0.267852	-0.0879392	-0.274572	0.356071	0.242852	-0.0773672	0.20991	-0.0804214	0.284245	-0.0607062	-0.22976	0.312614	-0.676286	-0.587667	-0.347559	0.505724	-0.390002	-0.130881	-0.121359	0.690513	0.0855528	0.110456	0.297583	-0.184037	-0.145582	-0.257489	0.463594	-0.388062	-0.220688	-0.0588903	-0.0863718	-0.292265	-0.0561047	-0.130916	-0.0326027	0.0136384	-0.705242	0.0157039	0.108285
MAPK	MAPK signaling pathway	-0.64773	-0.552879	-0.562941	-0.615873	-0.250114	-0.437443	-0.521486	-0.757207	-0.340569	-0.442113	0.274557	-0.565517	-0.27955	-0.248773	-0.26267	0.101439	-0.563741	-0.610238	-0.198944	-0.180351	-0.747397	-0.567093	-0.35691	-0.489215	-0.148204	-0.169935	-0.367246	-0.346284	-0.379257	-0.54544	-0.285361	-0.416199	-0.13314	-0.340382	-0.545121	0.0602142	-0.501024	-0.0124196	-0.357319	-0.198115	-0.201962	-0.753536	-0.260761	-0.591717	-0.524747	-0.752837	-0.132971	0.0456653
BCR	B cell receptor signaling pathway	1.78777	2.17934	2.10888	1.61311	2.08265	1.85854	1.60115	2.08742	2.57469	1.82811	2.79197	1.96323	2.04272	2.40925	2.12558	2.49508	2.38385	1.9417	2.23976	1.95491	2.4246	1.60875	2.43793	1.68796	2.03493	2.01436	1.80817	2.19521	2.16536	1.59941	2.72393	2.03444	2.1607	2.00683	1.92145	3.11377	1.82655	2.38843	2.22932	2.42865	2.3806	1.59413	1.84867	1.78246	1.9002	1.34694	2.59181	2.39978
VEGF	VEGF signaling pathway	0.985635	1.05079	0.800383	0.664153	1.08623	1.18109	0.860848	0.768331	0.98361	0.914599	1.35723	0.947274	1.08083	1.30535	0.658769	1.44186	0.940961	0.846977	0.815552	1.28379	0.876447	0.973835	1.2052	0.873736	1.12681	1.12056	0.824181	1.34268	0.915746	0.927595	1.50624	1.08098	1.26026	0.894634	1.1583	1.63436	1.03607	1.23662	0.915891	1.39436	1.02095	0.734342	0.6856	1.03713	0.877069	0.499622	1.24931	1.31514
mTOR	mTOR signaling pathway	1.52198	1.49174	1.48265	1.34755	1.60504	1.3804	1.09053	1.32158	1.56149	1.4588	1.45444	1.518	1.76277	1.24708	1.49185	1.48614	1.24308	1.52144	1.24272	1.50978	1.47439	1.47936	1.58199	1.32193	1.33441	1.62368	1.26036	1.49832	1.32618	1.64945	1.37482	1.41233	1.63053	1.96114	1.4583	1.64523	1.74128	1.50028	1.72235	1.66222	1.46312	1.28208	1.2813	1.27667	1.537	1.54943	1.79414	1.45515
PPAR	PPAR signaling pathway	1.57608	0.507838	2.18506	0.740024	0.0733212	0.201044	0.435432	0.426931	0.163204	0.337947	1.63134	0.805083	0.0837781	-0.320786	-0.0995796	1.36348	0.31655	0.656832	0.489955	2.27246	0.147282	1.22692	1.7675	0.667025	0.585652	1.14162	2.03115	2.59042	-0.256914	0.400631	1.46878	2.53	-0.105468	0.304621	2.43013	1.30496	1.25134	0.959416	0.356097	2.14642	0.413126	1.53721	0.927895	2.20831	0.533232	1.69678	0.604577	0.568377
Wnt	Wnt signaling pathway	1.93552	1.76297	2.09714	2.14543	2.00586	2.14473	1.85451	2.56673	2.13483	2.13915	2.46918	2.37173	2.19326	2.49799	2.25313	2.49258	2.14803	1.66111	1.86159	1.92259	1.77215	1.85196	2.02388	2.29752	1.80771	2.09589	1.77928	1.8998	1.47572	1.73149	1.93424	1.82926	2.46254	2.25173	1.88494	1.96982	1.89289	2.61338	2.02301	2.34925	2.43545	1.95555	2.67817	1.56312	2.04758	2.03217	2.14148	2.28718
HIF	HIF-1 signaling pathway	3.17446	3.28851	3.34667	3.19606	3.69694	3.18859	2.93345	3.44338	3.49644	3.40153	3.88093	3.31911	2.99146	3.31873	3.26541	3.39532	3.16928	2.97034	2.9197	3.46152	3.44775	3.19706	3.46236	3.17179	3.31777	3.27762	3.51881	3.56964	3.01104	2.88004	3.7515	3.29719	3.07835	3.04998	3.76799	4.05833	3.29487	3.37933	3.36057	3.88511	3.46714	3.30721	2.88901	3.45472	3.17996	3.05347	3.63786	3.44824
Notch	Notch signaling pathway	2.31788	2.6603	2.88652	2.44692	2.92362	2.53013	3.27129	2.75303	2.08556	2.55222	2.70924	2.44367	2.91037	3.36097	2.8031	3.00367	2.60018	1.99315	2.35935	2.42518	2.17208	2.26347	2.93897	2.63823	3.02922	2.7211	2.32122	2.80161	2.82129	2.65491	2.72549	2.95193	2.98297	2.25899	2.31157	2.8225	2.80025	2.78896	2.49609	2.53032	2.76882	2.32752	2.88182	2.27391	1.78108	2.51859	2.68024	2.69884
Hedgehog	Hedgehog signaling pathway	-1.48567	-1.54994	-1.47411	-1.77159	-1.37198	-1.55375	-0.787785	-1.31693	-1.74304	-1.43607	-1.05946	-1.65495	-0.51015	-0.704377	-1.07935	-1.25818	-1.52045	-1.92594	-1.41387	-1.57358	-2.18496	-1.90839	-1.49683	-1.69382	-1.47329	-1.51865	-1.8772	-1.21575	-1.32126	-1.71236	-1.20498	-1.39881	-0.946746	-1.21064	-1.54228	-1.29874	-1.08493	-1.03426	-1.49884	-1.33342	-1.43562	-1.47957	-1.19532	-1.85902	-1.88676	-1.85249	-1.12281	-1.3896
Hippo	Hippo signaling pathway	2.14529	1.30178	2.06196	2.30661	2.55811	2.17537	1.48664	2.53074	2.02776	2.51928	2.49315	2.12645	2.18838	2.62012	2.44736	2.41982	2.29685	1.59977	2.01653	1.65091	2.00339	1.84365	2.32061	1.54057	1.89508	2.16788	2.04138	1.62909	1.6825	1.55573	2.07231	1.84797	2.40233	2.74825	1.89561	2.03404	2.47849	2.46021	2.47225	2.47641	2.71432	2.20017	2.75258	1.42313	2.17897	2.01129	2.68355	2.30828
Apelin	Apelin signaling pathway	1.56105	1.48893	1.85246	1.85508	1.72601	1.9679	1.40067	2.05763	2.20798	2.0517	2.91456	2.39527	1.63858	1.61629	1.90413	2.9513	1.84936	1.81377	1.69609	2.04262	1.74479	1.87257	1.69715	2.16476	2.10296	2.43447	2.20562	2.02206	1.66355	1.93721	2.29797	2.37038	1.85874	1.83839	1.50126	1.73633	1.78665	2.40243	1.62179	2.42075	2.15866	1.3448	2.16536	1.46807	2.20838	2.37852	2.04318	2.47264
Sphingolipid	Sphingolipid signaling pathway	2.09326	1.84274	2.21713	1.87381	2.31006	2.11806	1.77426	1.85565	2.35646	2.0459	2.35872	1.95358	2.40332	2.47996	2.13331	2.70965	2.17645	1.97783	1.99565	2.14403	2.00584	1.99271	1.81045	1.31735	1.9139	1.95714	1.64714	1.85713	2.19178	1.7384	2.10391	1.45523	2.44812	2.47047	2.14097	2.64267	2.08192	1.92326	2.39	2.43903	2.12478	2.1214	2.3026	1.67188	2.32038	1.78729	2.65132	2.39947
PI3KAKT	PI3K-Akt signaling pathway	0.553469	0.670488	0.825683	1.23004	1.69849	1.42358	0.365032	1.2965	2.18184	1.97929	2.6811	1.82552	1.14318	1.76245	1.84219	2.44335	1.30325	0.939762	1.19828	1.1801	1.4991	0.602891	1.52067	1.15616	1.67401	2.23864	1.45824	1.22624	1.27343	1.01774	1.77798	1.11889	1.68017	1.55542	1.36197	2.12995	1.31874	2.20816	2.19499	2.13262	2.33434	0.664983	1.68385	0.982257	1.4497	1.35411	1.9214	2.01038
IL17	IL-17 signaling pathway	1.14109	0.404969	0.397593	-0.251459	0.87624	-0.195413	0.128119	-0.44973	0.540694	-0.428334	0.365303	-0.134363	0.210986	-0.0238005	-0.211153	0.187348	0.196582	1.23593	1.68018	0.191227	0.594276	-0.234002	-0.0810458	0.233579	0.873587	0.023215	0.208524	-0.145005	2.03177	0.146425	0.120451	0.505361	-0.189511	0.243981	0.566116	0.965805	0.211733	0.480078	-0.200329	0.595846	0.489833	0.925794	0.699031	0.863754	0.469412	0.0734881	1.73571	0.528146
GAG_bios_CSDS	Glycosaminoglycan biosynthesis - chondroitin sulfate / dermatan sulfate	0.360839	0.790547	0.530715	0.686412	1.28974	0.877695	1.26927	1.04439	0.870976	1.13999	1.74294	0.970072	0.752692	1.13022	1.07416	1.08101	0.894759	0.599452	0.566772	0.815057	0.747277	0.361051	1.26307	1.14732	0.92782	1.14002	0.458167	0.823054	0.71615	0.929658	1.11304	1.20941	0.665131	0.234253	0.788534	1.59557	0.613648	1.1177	0.959105	0.942026	1.13532	0.394811	0.886143	0.574202	0.332708	0.288023	0.992349	1.0487
GAG_bios_HS	Glycosaminoglycan biosynthesis - heparan sulfate / heparin	-1.40703	-0.676948	-1.10971	-1.19862	-0.888859	-0.895641	-0.80759	-1.06171	-1.13673	-0.955804	-0.951083	-1.07433	-0.880238	-0.524722	-0.936453	-0.849832	-1.07665	-1.39985	-1.25536	-1.12046	-1.25558	-1.36236	-0.847744	-0.942474	-0.856545	-0.774283	-1.00892	-0.973634	-1.11554	-0.700839	-0.847369	-0.457296	-1.0791	-1.22233	-1.19319	-0.718836	-1.28929	-0.948231	-1.32389	-1.17259	-0.995085	-1.25454	-1.27608	-1.31858	-1.44488	-1.41454	-1.08132	-0.739583
GAG_bios_KS	Glycosaminoglycan biosynthesis - keratan sulfate	-0.231594	-0.404861	-0.327669	-0.342013	-0.445357	-0.464029	-0.237303	-0.146833	0.0190836	-0.170724	-0.0431466	-0.417172	-0.28832	-0.30629	-0.136123	-0.134708	-0.317653	-0.50179	-0.548652	-0.0442074	-0.43431	-0.504554	0.0330388	-0.210591	-0.156219	0.0426216	-0.311999	-0.0312763	-0.433228	-0.565014	0.0775478	-0.256563	-0.292528	-0.277385	0.0208672	0.336713	-0.0250924	-0.277764	-0.607	-0.00467878	-0.21381	-0.449368	-0.667498	-0.533379	-0.362474	-0.515787	-0.225746	-0.038196
PDGF	Signaling by PDGF	1.2987	1.67784	1.7813	2.46345	2.76395	2.97652	1.00428	2.3198	3.78607	3.53251	4.68475	3.39067	1.79491	2.43995	3.36583	3.81055	2.52792	2.77776	2.5962	1.93244	2.81831	1.36189	2.82749	2.34058	3.47588	4.05686	2.55591	2.48859	2.81371	2.45174	3.28794	2.71472	2.87094	2.16448	2.94559	4.09811	2.42538	3.61895	3.78165	3.25169	3.772	1.60185	2.46933	2.29516	2.91208	2.01591	3.01082	3.1554
IFN	Interferon signaling	6.6645	8.32115	7.07639	6.6247	8.18549	8.19017	6.79426	7.89885	9.21637	7.27401	8.19651	7.39059	7.16888	7.43178	7.32425	8.07171	8.402	9.57986	8.05571	6.45661	9.87809	6.17098	7.06871	6.96934	8.59979	7.00499	7.81374	6.96828	8.34167	6.674	7.99819	7.61572	7.0007	6.09289	7.07365	8.50732	6.6897	7.13015	7.64523	6.95151	7.6151	6.86286	7.27829	8.21996	7.47358	6.01112	7.3428	7.70935
IFNab	Interferon alpha beta signaling	3.31246	6.35013	4.37014	3.38631	4.91314	5.16783	4.73329	5.12891	5.77339	4.48859	5.56099	4.22106	4.13477	5.06129	4.63802	5.73709	4.90533	6.3063	5.47376	3.83907	6.02779	3.08509	3.99828	4.11203	5.83892	4.03163	5.05099	4.54638	5.1321	4.22444	5.57359	5.25749	4.36209	3.48549	4.00025	5.83753	3.55846	4.6681	4.21491	4.14948	4.38161	4.09035	4.05074	5.4977	4.07622	3.02475	4.6895	4.96598
IFNg	Interferon gamma signaling	3.85108	4.87654	4.59731	3.92561	5.10887	5.17299	4.28288	4.88136	6.32382	4.05677	5.71963	4.66149	4.59546	4.78663	4.78388	5.12918	5.76394	5.89442	4.59234	4.15591	7.02972	3.35462	4.3672	4.76257	5.684	4.3974	4.36838	4.64706	5.57424	3.90581	5.33974	4.83974	4.51758	3.57131	4.5289	5.81826	4.2145	4.38452	5.0145	4.29838	5.36731	3.75587	4.06093	5.11378	4.86057	3.2929	4.73591	4.8326
Matrix	Extracellular matrix organization	3.06077	4.2626	4.02735	5.78805	5.11161	6.52838	3.73088	5.92239	7.63816	7.24072	9.56799	6.79126	3.97259	6.08115	7.58086	7.85703	5.77384	4.67516	4.03148	4.65286	5.88683	3.83791	6.39876	5.99794	6.89923	8.0752	6.05461	6.04111	5.69216	5.34131	8.00648	6.30269	5.83176	4.51725	6.49802	8.43218	5.58591	7.79233	7.11396	6.84268	7.89077	3.72677	5.05907	4.62793	5.31655	4.84566	6.60322	7.28306
SEMA	SEMA4D in semaphorin signaling	4.02162	4.83989	4.43697	4.19889	4.0025	4.98226	5.19403	4.34762	3.9726	4.45231	4.76478	4.66466	4.54518	4.39957	4.29566	4.87959	4.22147	3.90633	4.44426	4.79918	4.08672	4.0077	4.15356	4.95434	4.65148	4.69786	4.37782	4.37544	4.64967	5.03963	4.56204	4.6541	4.66091	4.4244	4.4687	4.53488	4.61214	4.75822	4.1431	4.54827	4.68963	4.59276	4.84378	4.20965	4.46005	4.11305	4.62269	4.45592
GAG_meta	Glycosaminoglycan metabolism	0.100515	0.419754	0.390252	0.904662	0.871696	0.976471	0.687105	1.19257	1.30607	1.8148	2.33969	1.24186	0.344578	1.53239	1.63982	1.66141	1.14627	0.737309	0.271456	0.5939	0.769877	0.437682	1.43979	1.06864	1.37349	1.60955	0.873366	1.03603	0.530928	0.884595	1.59972	1.30959	1.11094	0.526889	1.12841	1.99895	1.04372	1.59239	1.09473	1.15208	1.54052	0.225027	0.853638	0.252566	0.429368	0.243321	1.09328	1.61959
KS_meta	Keratan sulfate keratin metabolism	0.066366	-0.381358	-0.189558	0.456737	-0.00700589	0.060561	-0.247651	0.517805	0.934387	0.846026	1.28257	0.570606	-0.182376	0.490885	0.852836	0.945762	0.4293	0.412453	-0.0324246	0.414629	0.441833	0.336055	0.44505	0.279223	0.317237	0.669531	0.347803	0.465209	-0.198707	-0.0845119	0.783324	0.125069	0.53846	0.126307	0.506722	1.03041	0.450084	0.736269	0.616781	0.665926	1.02332	-0.152829	0.20406	0.128193	0.278285	-0.00139905	0.207183	0.758872
KS_bios	Keratan sulfate biosynthesis	-0.290294	-0.705664	-0.551771	-0.0085945	-0.505629	-0.461892	-0.489093	0.0715597	0.540157	0.351078	0.589973	0.0162345	-0.555049	-0.0552415	0.283937	0.291175	-0.114002	-0.0817963	-0.439252	0.0228984	-0.036716	-0.192102	0.0489344	-0.100668	-0.0770999	0.284102	0.102736	0.0526001	-0.675743	-0.540329	0.274396	-0.259413	-0.0351141	-0.24729	0.0872713	0.392186	-0.0339402	0.16365	0.123551	0.0966964	0.469573	-0.597912	-0.210454	-0.276333	-0.156116	-0.328088	-0.231973	0.315218
COL	Collagen formation	2.46043	3.72774	3.54833	4.2475	4.09777	5.06938	2.95104	4.23287	5.89086	5.73635	7.73241	5.30878	3.46073	4.91577	5.61756	5.89308	4.5519	3.76267	3.69887	4.03234	4.49963	2.87891	4.85903	4.98933	5.87394	7.00124	5.19296	4.74882	5.0889	4.42513	6.32198	4.94241	4.76311	3.77947	5.42741	6.73751	4.36883	5.96839	6.25801	5.85205	6.58357	3.27283	4.05405	3.97693	4.21864	3.68407	5.17757	5.64609
HS_meta	Heparan sulfate heparin metabolism	0.0772083	0.964869	0.626159	0.686728	0.637413	1.1033	0.963708	0.939214	0.569492	1.08695	1.45117	0.938914	0.855756	1.64782	1.3639	1.26301	0.917417	0.419929	0.210747	0.423686	0.401941	0.303397	1.11515	1.11457	1.22272	1.20532	0.543243	0.901098	0.717435	1.21219	1.25198	1.39797	1.04895	0.650246	0.860218	1.31754	0.783306	1.39124	0.698559	0.73862	1.03603	0.513652	0.401352	0.0779246	0.0935755	0.231591	0.973896	1.30802
CSDS_meta	Chondroitin sulfate dermatan sulfate metabolism	0.84102	1.38543	1.13521	1.53538	1.68436	1.77039	1.7348	1.77857	1.5802	2.14543	2.69827	1.8617	1.2638	2.09708	2.22576	2.0744	1.75577	1.45457	1.19038	1.20386	1.31429	1.06204	2.01952	1.97703	1.88069	2.09422	1.15951	1.48898	1.55372	1.85204	1.85345	1.97899	1.7575	1.21389	1.66144	2.38907	1.674	2.3427	1.85209	1.71464	1.95237	1.23228	1.60134	1.00069	1.07101	0.954224	1.79866	1.98582
CS_bios	Chondroitin sulfate biosynthesis	0.987341	1.43166	1.24196	1.86201	1.968	1.84393	1.59511	1.89703	2.06927	2.50305	2.76251	1.81086	1.17793	1.95392	2.26689	2.04622	1.78268	1.57043	1.07493	1.49492	1.82883	1.26381	2.27888	1.94137	2.08223	2.03539	1.68045	1.8008	1.44282	1.61688	2.17251	2.07501	1.73524	1.25473	1.80496	2.43677	1.91235	2.25649	2.25868	1.98425	1.93172	1.22571	1.58921	1.27708	1.2895	1.24302	2.24141	1.96432
HA_meta	Hyaluronan metabolism	0.694155	0.491038	0.922032	0.803088	0.948005	0.930545	0.462488	1.01323	1.0176	1.27221	1.25523	1.14617	0.349184	0.986574	0.938257	1.32048	1.16389	1.07656	0.763935	0.892142	0.954484	1.00238	1.04942	0.682609	1.3222	1.26919	1.05162	0.878277	1.08954	0.917139	1.02087	0.83637	1.15207	0.850836	1.23514	1.48123	1.13379	0.984438	0.999751	1.028	1.1698	0.695802	1.23187	0.726952	1.0465	0.702711	0.836776	1.1467
DS_bios	Dermatan sulfate biosynthesis	0.729854	0.772728	0.951041	1.65061	1.30287	1.32811	0.801977	1.45208	1.86335	2.25566	1.85839	1.55493	0.930246	1.38177	1.95921	1.71131	1.7705	1.62151	0.77163	0.65977	1.58131	1.22877	1.91985	1.21976	1.51374	1.71445	1.38948	1.1492	1.06186	1.12462	1.56528	1.32925	1.67756	1.15492	1.46016	1.60879	1.52129	1.82891	1.84472	1.48298	1.63769	1.11294	1.34817	1.143	1.3037	1.27109	1.87678	1.67597
[truncated: 73 more columns]
